# Supplementary material for: Genes and functions from breast cancer signatures
Source: Springer Nature journal article supplement (doi:10.1186/s12885-018-4388-4), 2018-04-27

A

Total gene No.

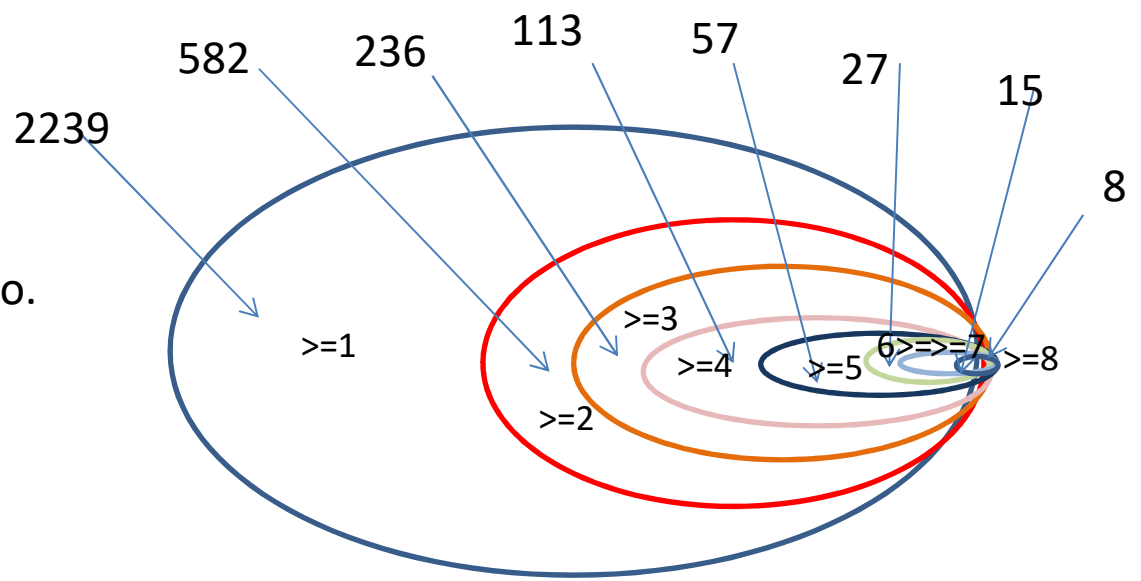

Unique gene No.

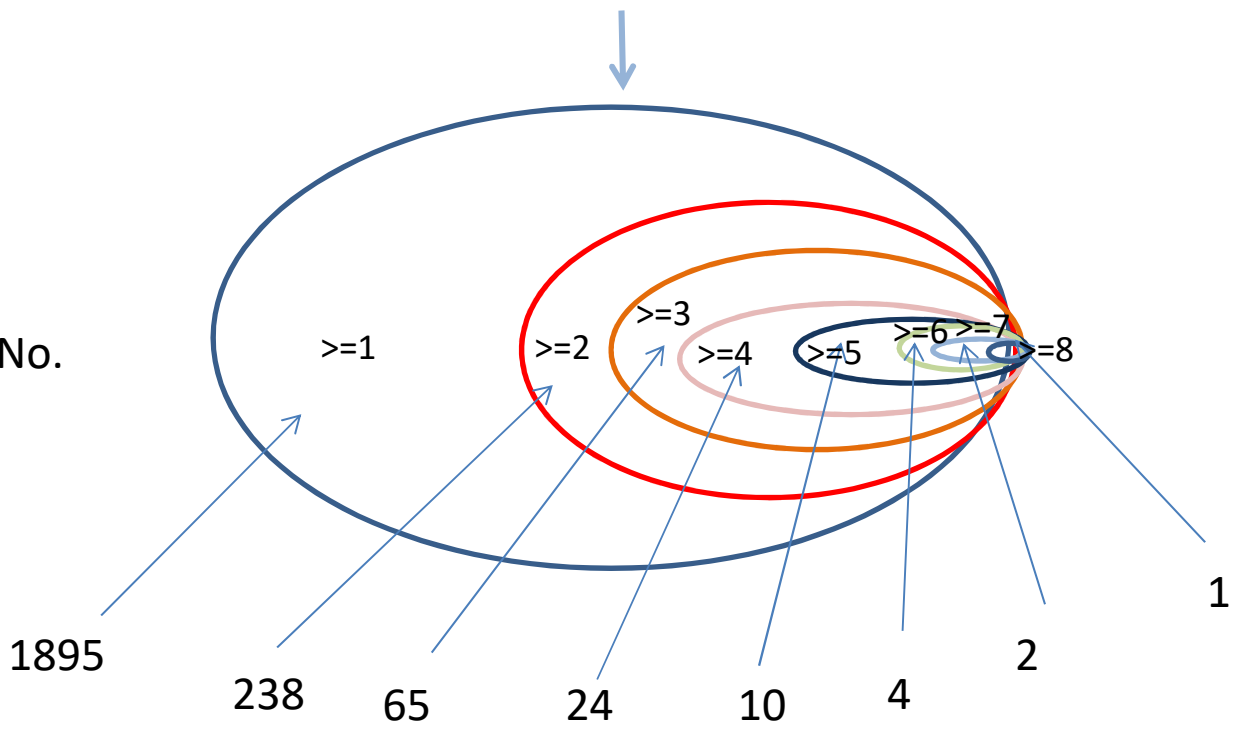

**B**

Total Function  
term No.

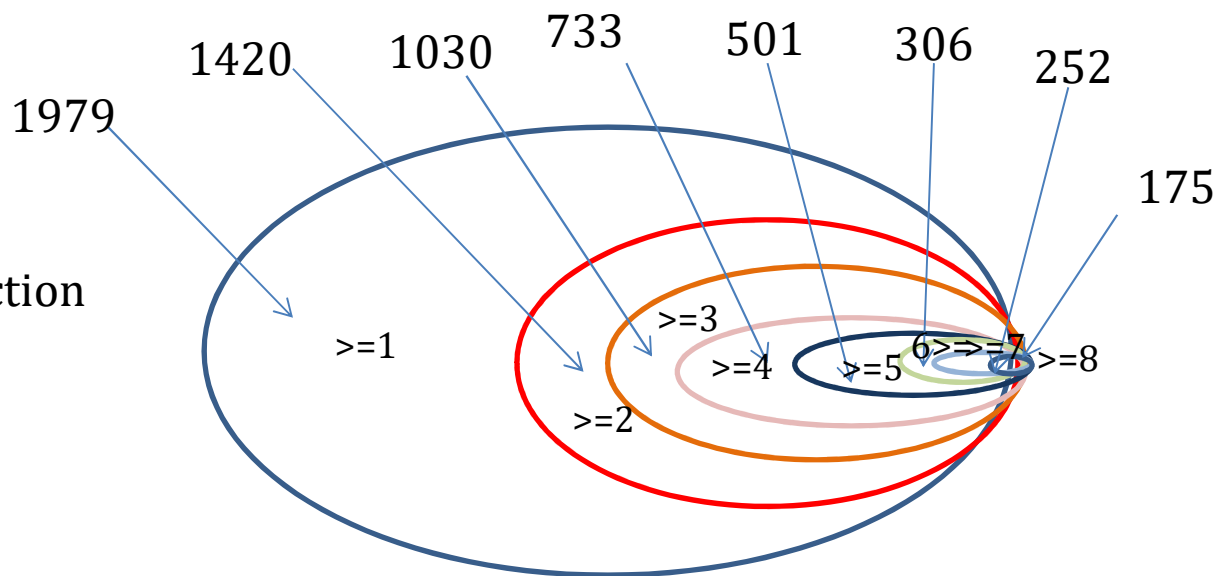

Unique function  
term No.

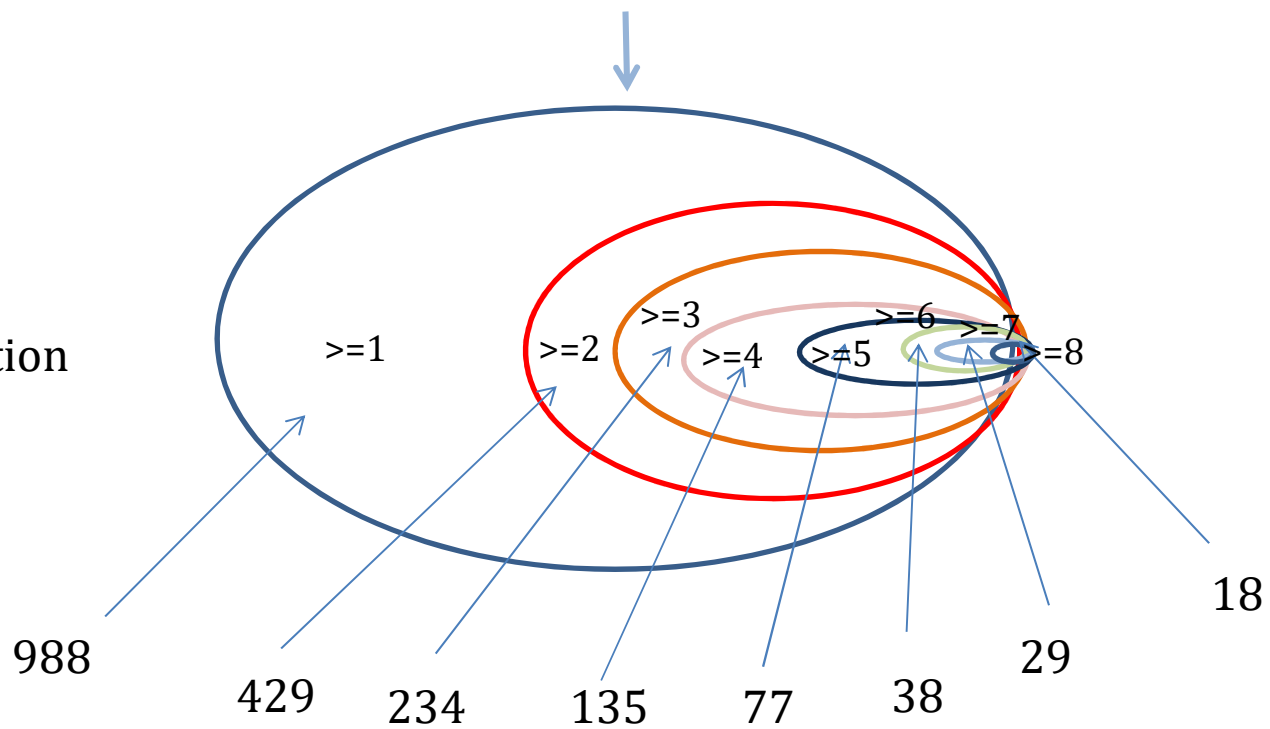

Supplement: MOESM8 [file 15725456]
