# Supplementary material for: Genes and functions from breast cancer signatures
Source: Springer Nature journal article supplement (doi:10.1186/s12885-018-4388-4), 2018-04-27
Supplement: MOESM12 [file 15725456]

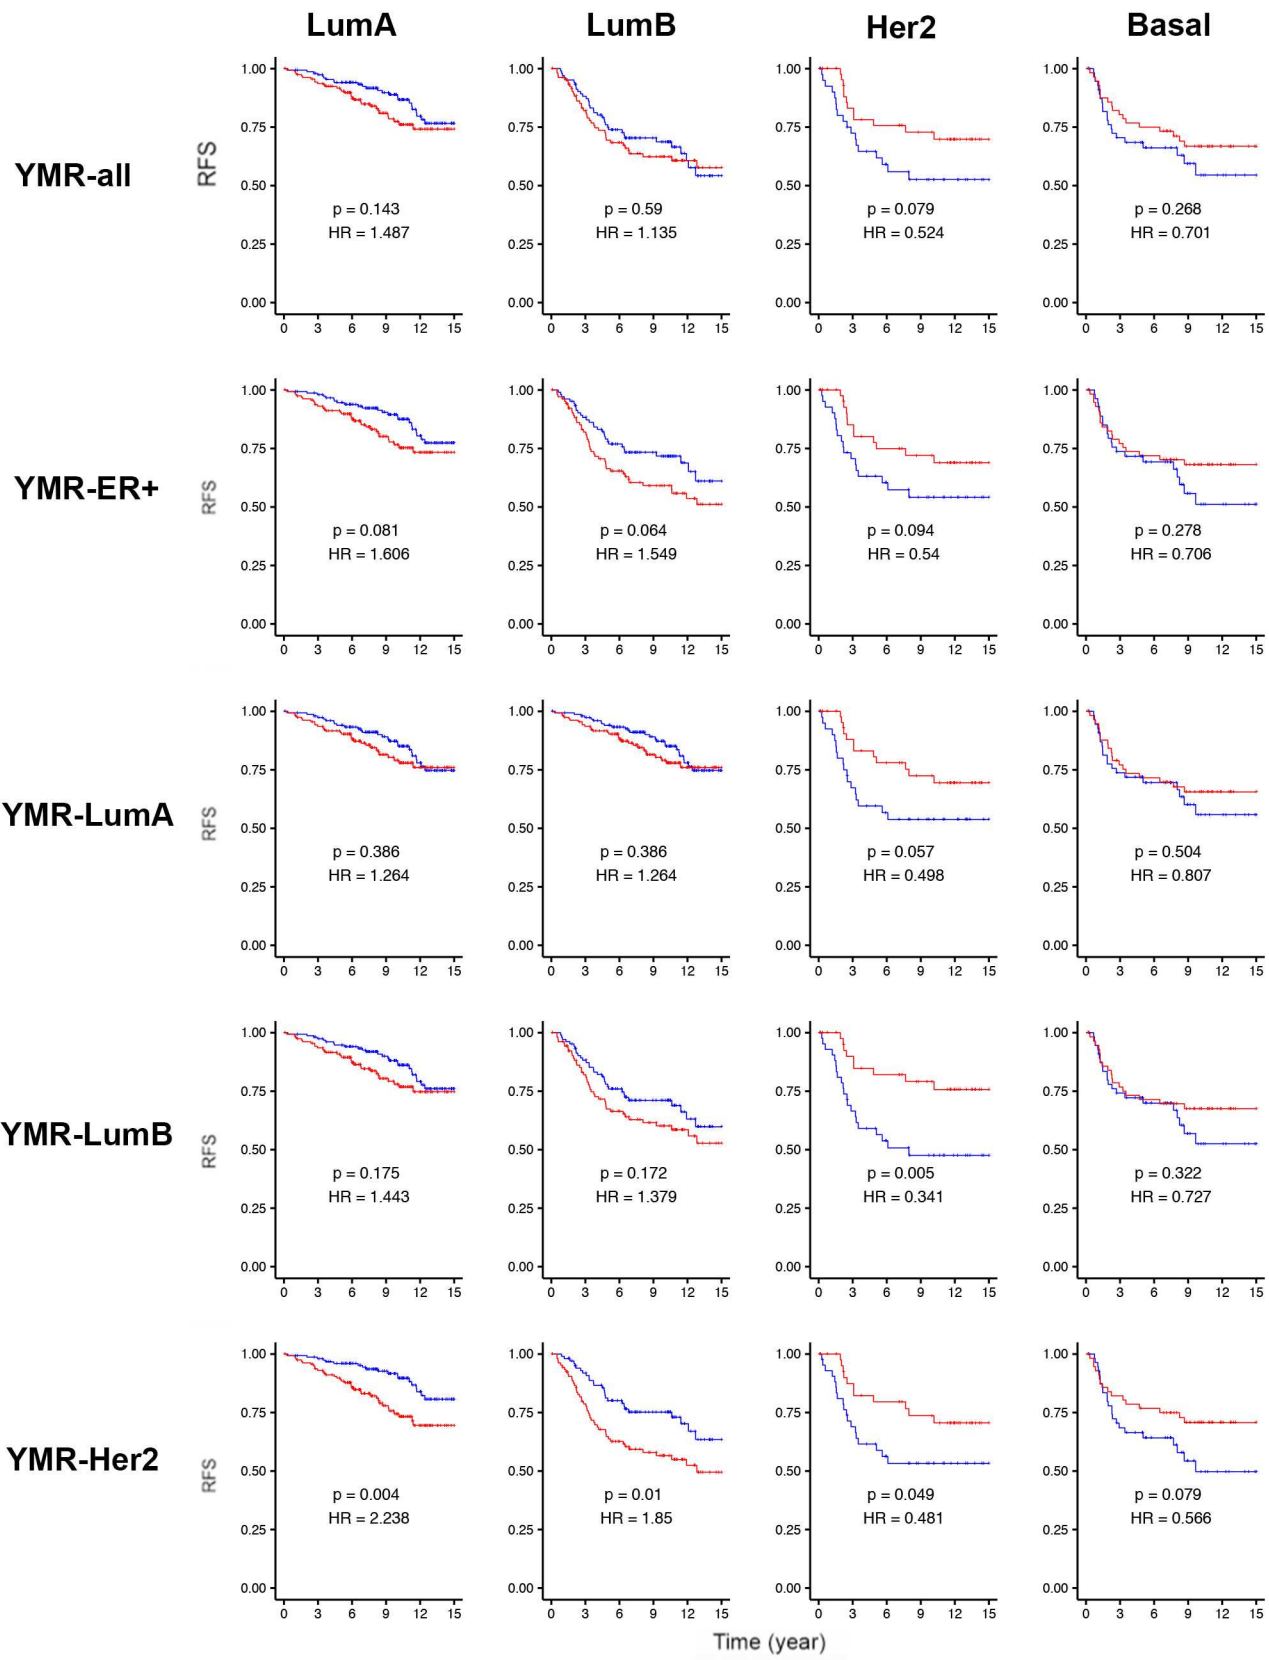

YMR-Basal

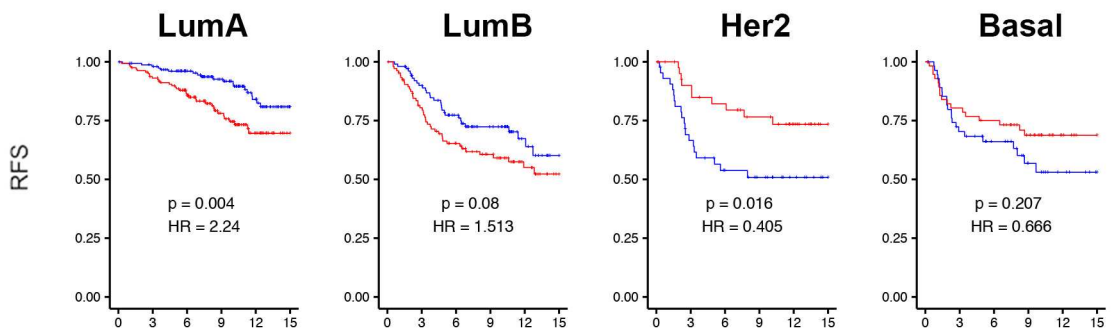

YMR-16

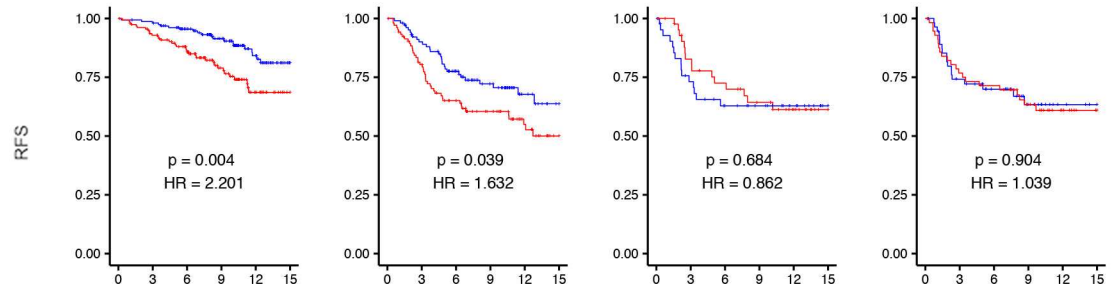

RS

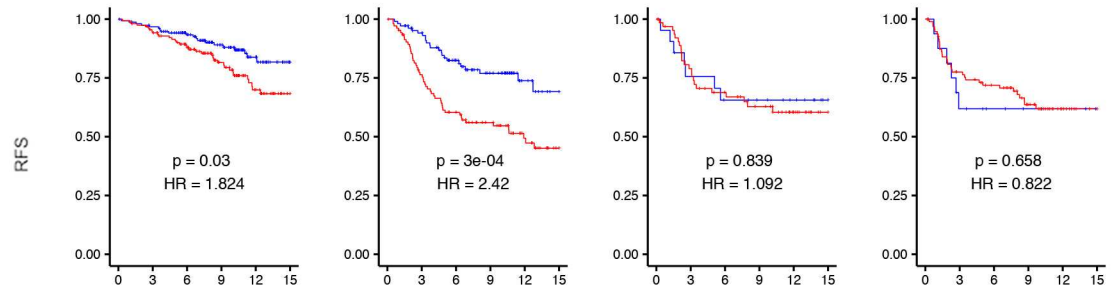

Mamma

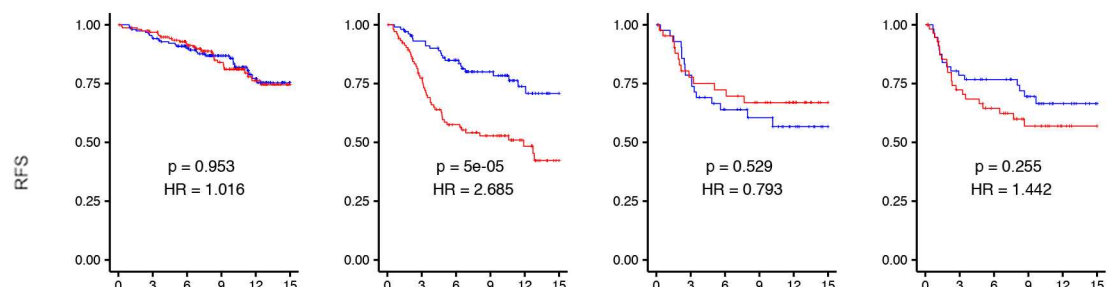

Multigene

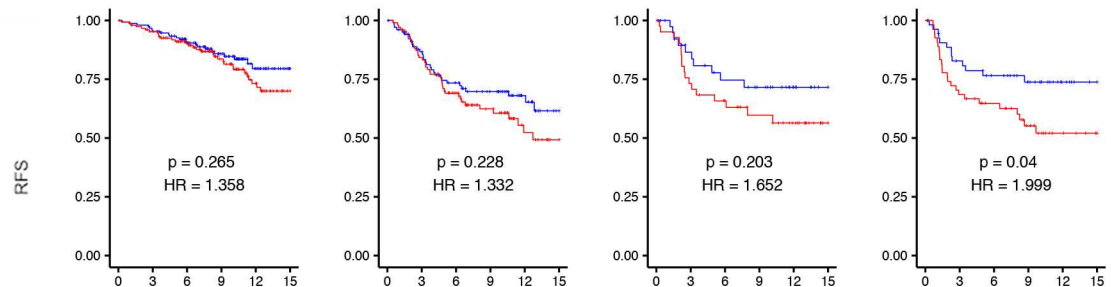

Time (year)
