# Supplementary material for: Genes and functions from breast cancer signatures
Source: Springer Nature journal article supplement (doi:10.1186/s12885-018-4388-4), 2018-04-27

## Additional File 13: Fig S5

### A. ER+/Node- versus normal

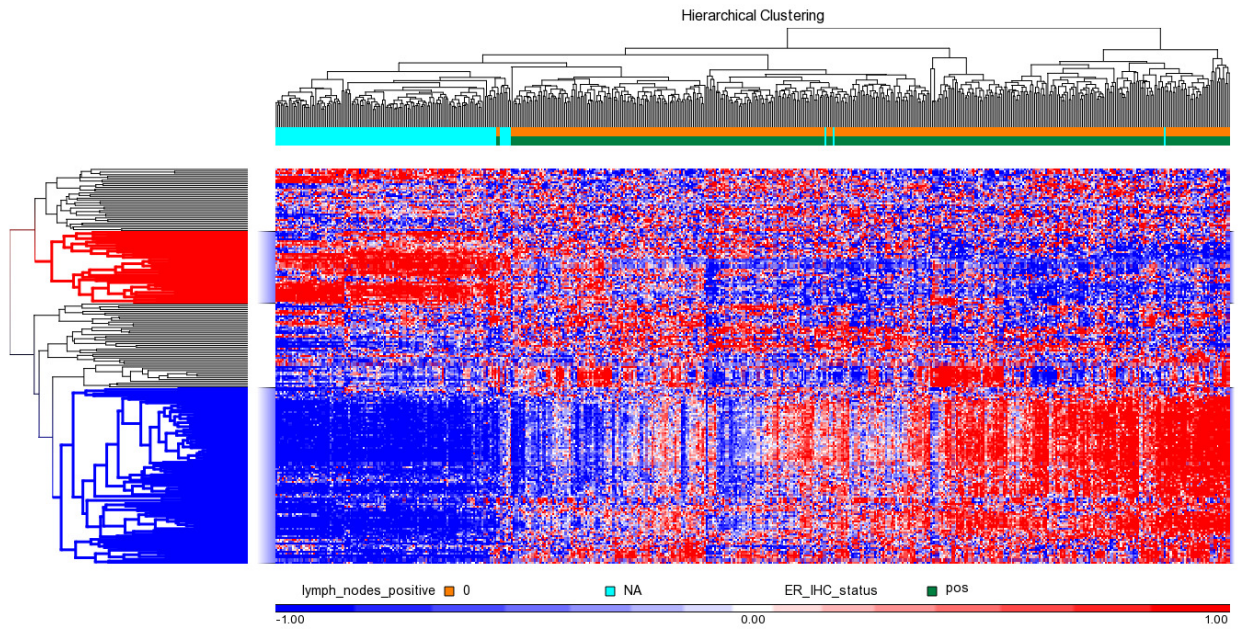

### B. LumA versus normal

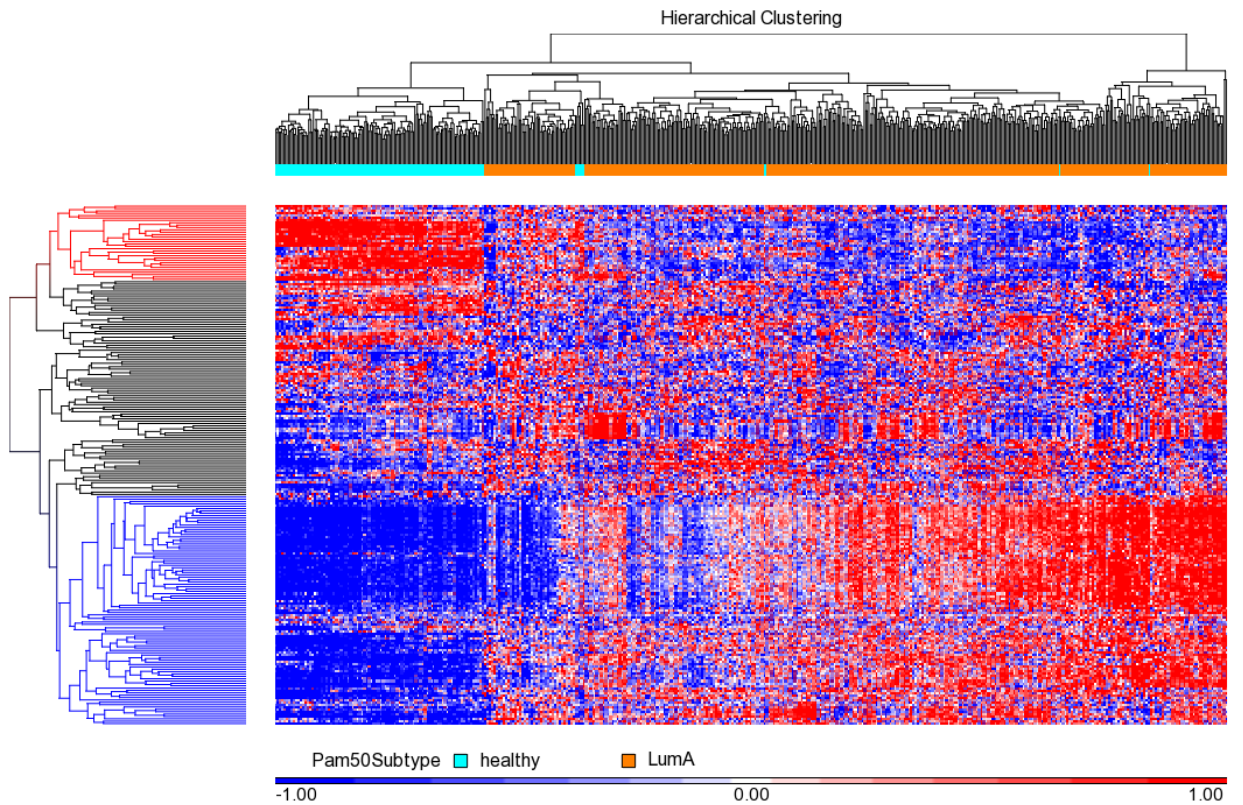

### C. LumB versus normal

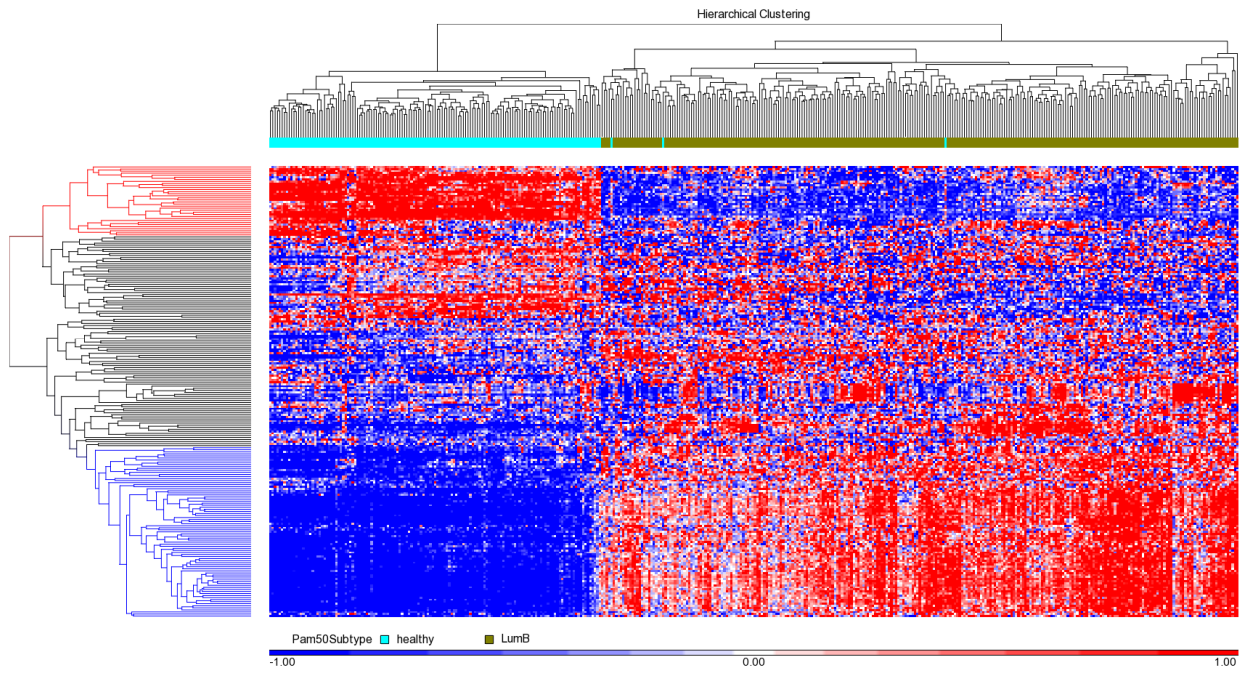

### D. Her2 versus normal

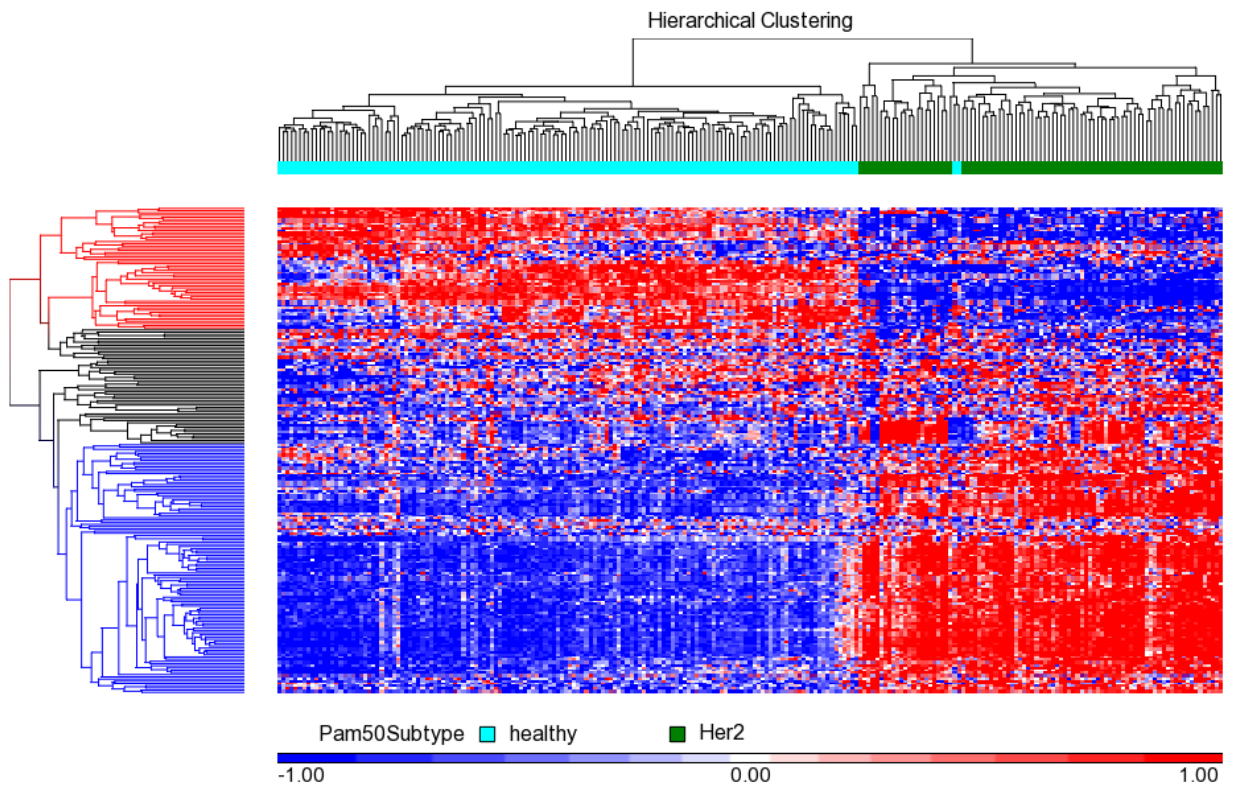

## E. Basal versus normal

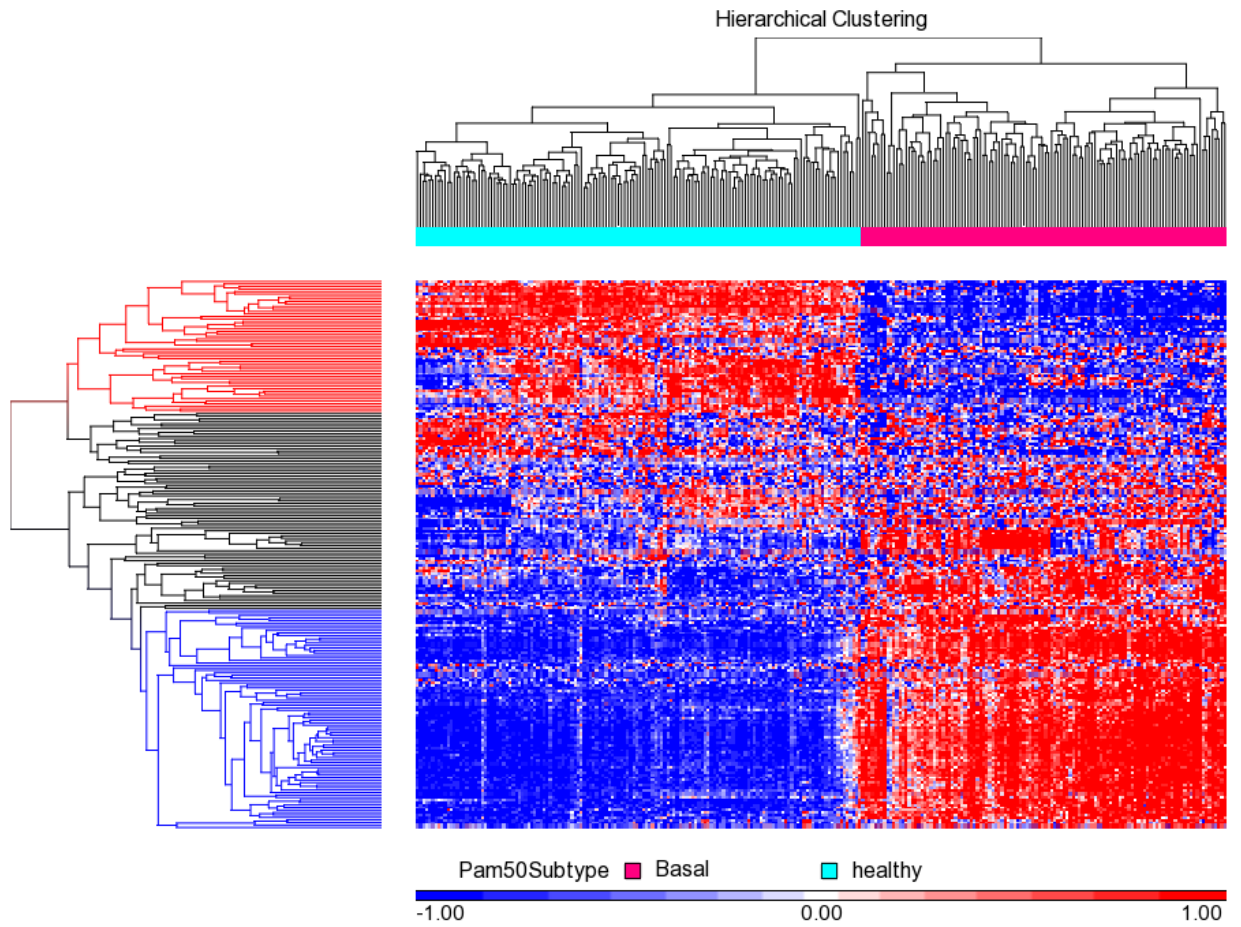

Supplement: MOESM13 [file 15725456]
