# Supplementary material for: Genes and functions from breast cancer signatures
Source: BMC Cancer. 2018 Apr 27;18:473. doi: 10.1186/s12885-018-4388-4 (PMC5921990; doi:10.1186/s12885-018-4388-4)
Supplement: Supplementary file 11 — Table S9. The selected Yin Yang gene lists with its enriched function terms. We showed the Yin gene list and the significant function terms of this gene list generated by DAVID in this table. We also showed the Yang gene list and the significant function terms of this gene list generated by DAVID. GO term Biological process and KEGG pathway were used to define the functions enrichment with the default settings (EASE p-value less than 0.1). (XLS 13 kb) [file 12885_2018_4388_MOESM11_ESM.xls]

## Sheet: Sheet1
Yin genes list	Function groups enriched Yin genes list	Yang genes list	Function groups enriched Yang genes list
ANLN ASPM AURKB BIRC5 BUB1 BUB1B CALR CCNA2 CCNB1 CCNB2 CCNE1 CCNE2 CDC2 CDC20 CDC25A CDC45L CDCA3 CDCA8 CDKN3 CENPA CENPF CEP55 CKS2 DDX39 DIAPH3 DLG7 DTL ECT2 ESPL1 EXO1 FEN1 FOXM1 GAPDH GARS GTSE1 HMMR KIAA1549 KIF20A KIF2C KIF4A MCM10 MCM2 MCM4 MCM6 MELK MKI67 MLF1IP MRPS12 NDC80 NEK2 NUDT5 NUSAP1 PLK1 PNKD POLQ PRC1 PRDX1 PSMA5 PTTG1 RACGAP1 RFC4 SHMT2 SLC7A5 SPAG5 TPX2 TRIP13 TROAP TTK UBE2…	GO:0007049~cell cycle GO:0022402~cell cycle process GO:0022403~cell cycle phase GO:0000279~M phase GO:0000278~mitotic cell cycle GO:0051301~cell division GO:0000280~nuclear division GO:0007067~mitosis GO:0000087~M phase of mitotic cell cycle GO:0048285~organelle fission hsa04110:Cell cycle GO:0051726~regulation of cell cycle GO:0007017~microtubule-based process GO:0000226~microtubule cytoskeleton…	CTG2 ADM ANGPTL4 CEBPD CXCL2 EMP1 FOXC1 FXYD1 IGF1 MFAP4 MGP PDGFD RCAN1 RGS2 SLC2A3 STAT5A TNFSF12 TPM2 WEE1 ZBTB20	GO:0030335~positive regulation of cell migration GO:2000147~positive regulation of cell motility GO:0051272~positive regulation of cellular component movement GO:0040017~positive regulation of locomotion GO:0030334~regulation of cell migration GO:2000145~regulation of cell motility GO:0040012~regulation of locomotion GO:0051270~regulation of cellular component movement GO:0008277~regulation of G-…
